# Supplementary material for: Nanoscale electrochemical movies and synchronous topographical mapping of electrocatalytic materials
Source: Royal Society of Chemistry journal article supplement (doi:10.1039/c8fd00028j), 2018-01-01
Supplement: c8fd00028j3.pdf [file c8fd00028j3.pdf]

*Supplementary information for*

Nanoscale Electrochemical Movies and  
Synchronous Topographical Mapping of  
Electrocatalytic Materials

*Cameron L. Bentley and Patrick R. Unwin*

Department of Chemistry, University of Warwick, Coventry CV4 7AL, U.K.

Email: [C.Bentley.1@warwick.ac.uk](mailto:C.Bentley.1@warwick.ac.uk) (C.L.B.) and [P.R.Unwin@warwick.ac.uk](mailto:P.R.Unwin@warwick.ac.uk) (P.R.U.)

## Supplementary Movie Captions:

**Movie S1.** Spatially-resolved electrochemical movie (2500 pixels over a  $2.5 \times 2.5 \mu\text{m}$  scan area, 400 pixels  $\mu\text{m}^{-2}$ , 384 image frames) obtained with the voltammetric hopping mode SECCM protocol, visualizing HER activity on a cleaved  $\text{MoS}_2$  surface. The nanopipet probe (diameter,  $d \approx 30 \text{ nm}$ ) contained 100 mM  $\text{HClO}_4$ . Experimental parameters were as follows: voltammetric scan rate ( $\nu$ ) =  $10 \text{ V s}^{-1}$ , total scan time ( $t_s$ ) = 635 s (*ca.* 0.25 s per pixel), approach voltage ( $E_a$ ) =  $-0.947 \text{ V}$ , initial potential ( $E_i$ ) =  $0.053 \text{ V}$  and final potential ( $E_f$ ) =  $-0.947 \text{ V}$  (all vs. RHE). The data presented are not interpolated.

**Movie S2.** Spatially-resolved electrochemical movie (2520 pixels over a  $3.5 \times 1.8 \mu\text{m}$  scan area, 400 pixels  $\mu\text{m}^{-2}$ , 230 image frames) obtained with the voltammetric hopping mode SECCM protocol, visualizing ORR/HER activity on GC-supported AuNCs. The nanopipet probe ( $d \approx 30 \text{ nm}$ ) contained 100 mM  $\text{H}_2\text{SO}_4$ . Experimental parameters were as follows:  $\nu = 10 \text{ V s}^{-1}$ ,  $t_s = 671 \text{ s}$  (*ca.* 0.27 s per pixel),  $E_a = -0.708 \text{ V}$ ,  $E_i = 0.142 \text{ V}$  and  $E_f = -0.458 \text{ V}$  (all vs. RHE). The data presented are not interpolated.

## Supplementary Figures:

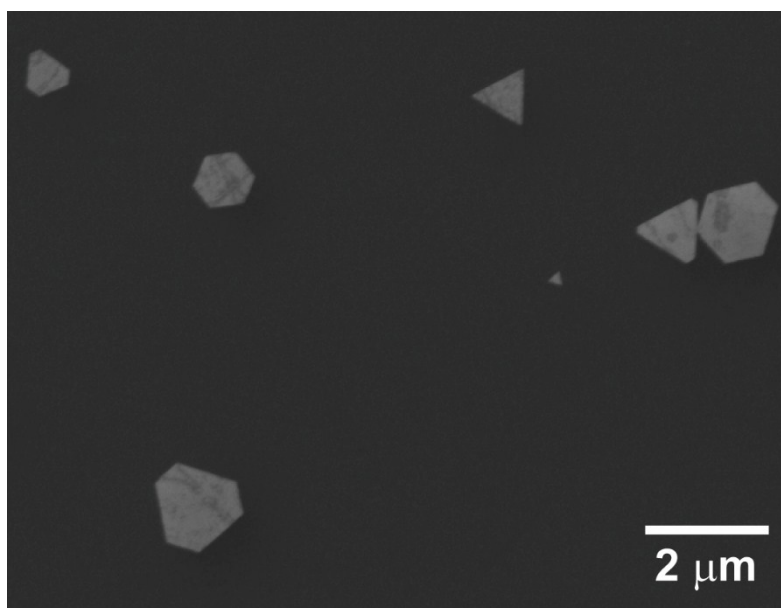

**Figure S1.** A representative SEM image of the two-dimensional (2D) Au nanocrystals (AuNCs), supported on glassy carbon (GC). The AuNCs range in size from *ca.* 100 nm to >1 μm.

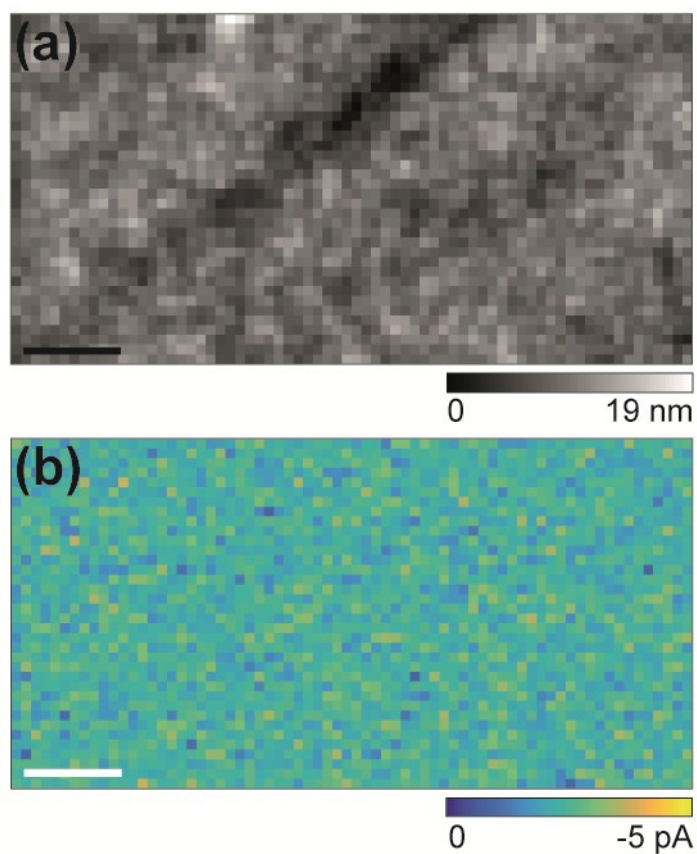

**Figure S2.** (a) Topographical and (b) spatially-resolved electrochemical maps (2520 pixels over a  $3.5 \times 1.8 \mu\text{m}$  scan area,  $400 \text{ pixels } \mu\text{m}^{-2}$ ) obtained with the voltammetric hopping mode SECCM configuration, obtained on a GC support surface. The nanopipet probe ( $d \approx 30 \text{ nm}$ ) contained  $100 \text{ mM H}_2\text{SO}_4$ . The electrochemical map was obtained at  $-0.43 \text{ V vs. RHE}$ . Experimental parameters are as follows:  $\nu = 10 \text{ V s}^{-1}$ ,  $t_d = 260 \mu\text{s}$ ,  $t_s = 671 \text{ s}$  (*ca.*  $0.27 \text{ s}$  per pixel),  $E_a = -0.708 \text{ V}$ ,  $E_i = 0.142 \text{ V}$  and  $E_f = -0.458 \text{ V}$  (all vs. RHE).

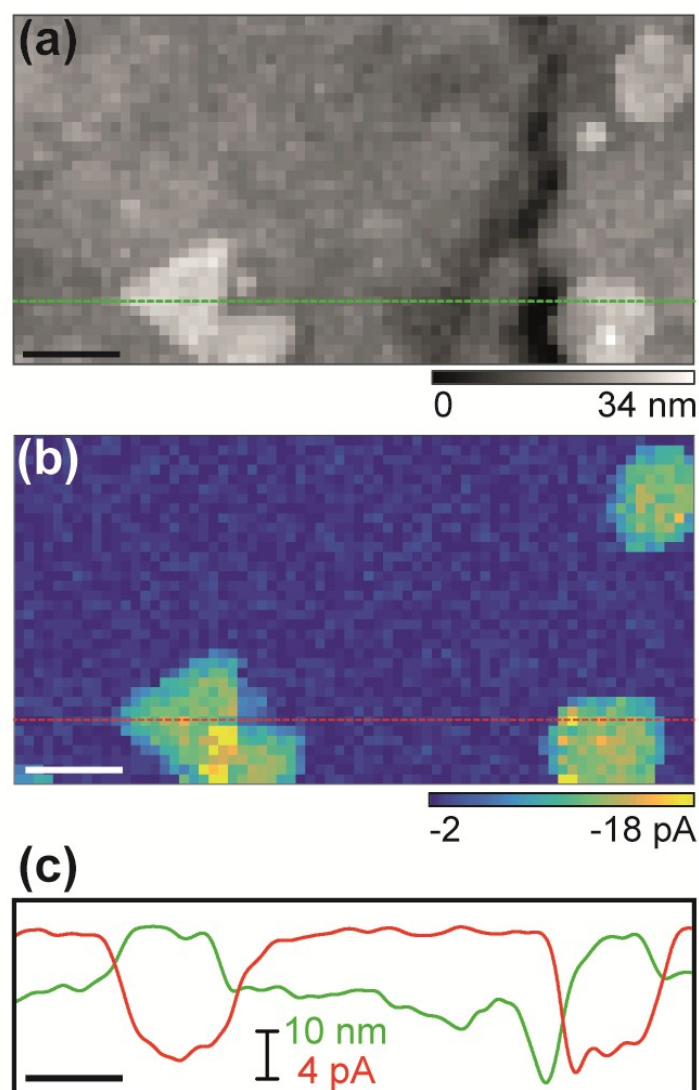

**Figure S3.** (a) Topographical and (b) spatially-resolved electrochemical maps (2520 pixels over a  $3.5 \times 1.8 \mu\text{m}$  scan area,  $400 \text{ pixels } \mu\text{m}^{-2}$ ) obtained with the voltammetric hopping mode SECCM configuration, visualizing ORR/HER activity on GC-supported AuNCs. The nanopipet probe ( $d \approx 30 \text{ nm}$ ) contained  $100 \text{ mM H}_2\text{SO}_4$ . The electrochemical map was obtained at  $-0.43 \text{ V vs. RHE}$ . (c)  $z$ -position and  $i_{\text{surf}}$  line scan profiles of the area indicated by the green and red dashed lines in (a) and (b), respectively.  $0 \text{ nm}$  and  $0 \text{ pA}$  are the bottom-left and top-left corners of the plot, respectively. Experimental parameters are as follows:  $\nu = 10 \text{ V s}^{-1}$ ,  $t_d = 260 \mu\text{s}$ ,  $t_s = 671 \text{ s}$  (*ca.*  $0.27 \text{ s per pixel}$ ),  $E_a = -0.708 \text{ V}$ ,  $E_i = 0.142 \text{ V}$  and  $E_f = -0.458 \text{ V}$  (all vs. RHE). All  $xy$  scale bars indicate  $500 \text{ nm}$ . The data presented in (a) and (b) are not interpolated.

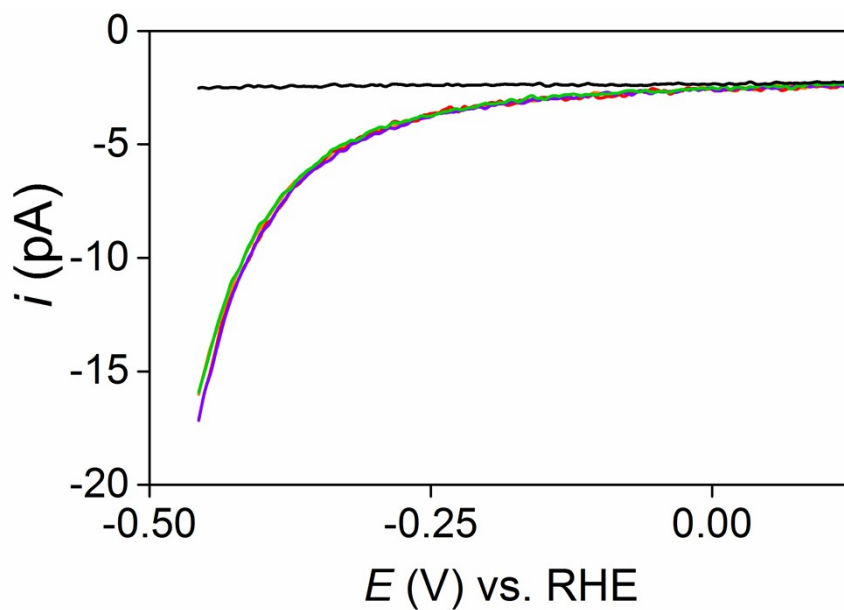

**Figure S4.** Average LSVs obtained on GC (black trace,  $N = 138$ , selected at random across the surface), AuNC-1 (orange trace,  $N = 68$ ), AuNC-2 (red trace,  $N = 35$ ), AuNC-3 (purple trace,  $N = 74$ ) and AuNC-4 (green trace,  $N = 56$ ), labelled in Figure 4c of the main text. Experimental parameters are as follows: Experimental parameters are as follows:  $\nu = 10 \text{ V s}^{-1}$ ,  $t_d = 260 \text{ } \mu\text{s}$ ,  $E_i = 0.142 \text{ V}$  and  $E_f = -0.458 \text{ V}$  (both vs. RHE).
